# Supplementary material
Source: publisher figshare collection journal article supplement (https://acs.figshare.com/ndownloader/files/5774277)
Supplement: Supplementary file 1 [file 5774277]

**RHF/6-31+G\* Structures and Partial Charges Used in the Study**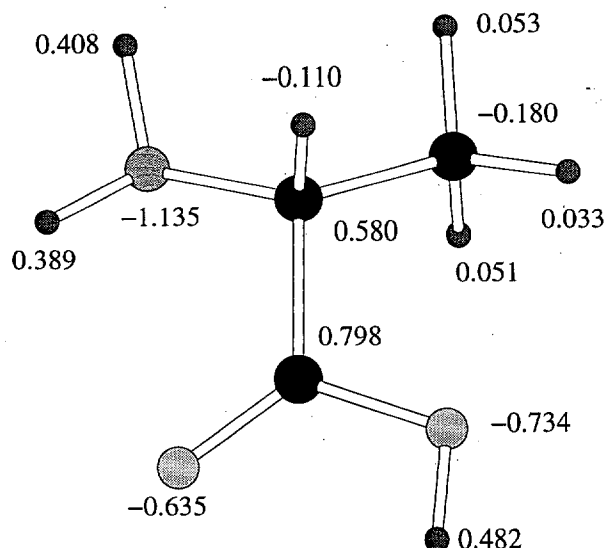**Zwitterionic form of D-alanine**

|   |           |           |           |
|---|-----------|-----------|-----------|
| N | -0.927771 | 0.678685  | -1.087191 |
| C | 0.274831  | 0.436376  | -0.317961 |
| C | 0.260460  | -1.001578 | 0.163995  |
| O | -0.701659 | -1.699921 | 0.194614  |
| O | 1.441647  | -1.401828 | 0.622676  |
| H | 0.316608  | 1.024854  | 0.602577  |
| C | 1.510384  | 0.768205  | -1.154546 |
| H | 2.422252  | 0.641182  | -0.585711 |
| H | 1.549128  | 0.140412  | -2.037253 |
| H | 1.453110  | 1.801050  | -1.482680 |
| H | 1.353282  | -2.290869 | 0.952905  |
| H | -1.730723 | 0.258009  | -0.663139 |
| H | -1.096086 | 1.659539  | -1.190714 |

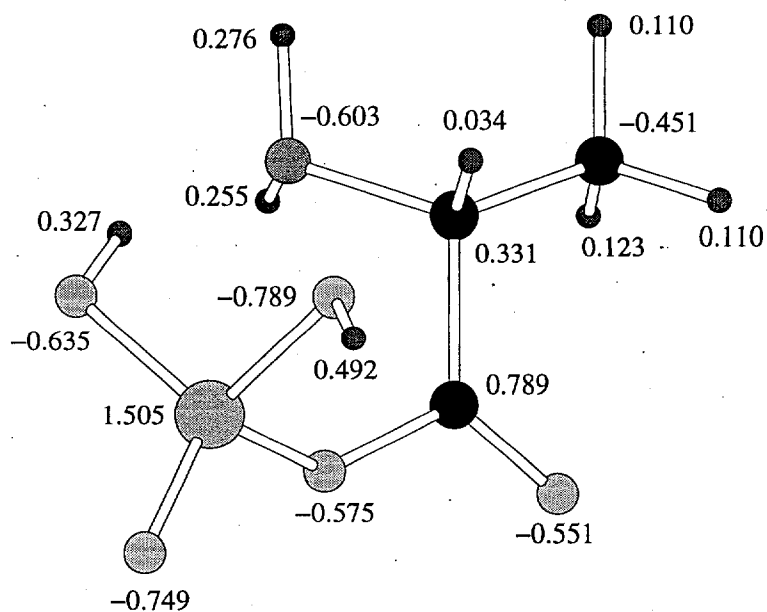

### Neutral form of the phosphoester derivative of D-alanine

|   |           |           |           |
|---|-----------|-----------|-----------|
| N | -0.635444 | 1.567103  | -1.805007 |
| C | 0.682655  | 1.138771  | -1.327342 |
| C | 0.678737  | -0.376918 | -1.128757 |
| O | 1.501216  | -1.090916 | -1.574576 |
| C | 1.839823  | 1.567043  | -2.223838 |
| H | 0.812647  | 1.573703  | -0.343093 |
| H | -0.675187 | 2.569219  | -1.830669 |
| H | -1.971279 | 0.991795  | -0.585174 |
| H | -0.796616 | 1.250323  | -2.744512 |
| H | 1.750335  | 1.133549  | -3.213430 |
| H | 1.841959  | 2.648489  | -2.317282 |
| H | 2.790482  | 1.256619  | -1.809824 |
| O | -0.350882 | -0.911021 | -0.433529 |
| P | -1.261881 | -0.456010 | 0.806002  |
| O | -2.318144 | 0.496233  | 0.170007  |
| O | -1.775256 | -1.563624 | 1.573979  |
| O | -0.275245 | 0.488312  | 1.625935  |
| H | -0.120670 | 0.164193  | 2.507134  |

## Titration Curves of Asp306 and its C-terminus

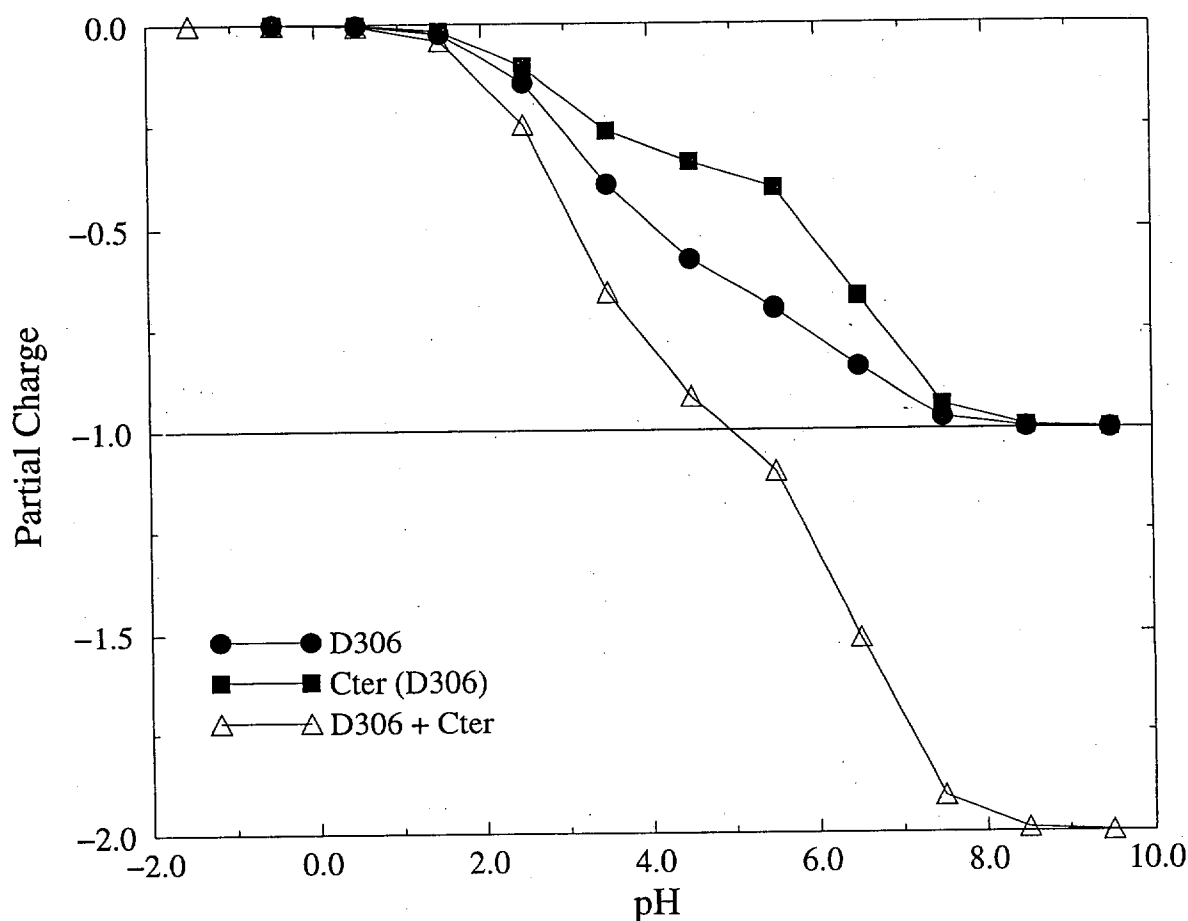

As the C-terminus, D306 possesses two carboxylic acid functionalities with their central carbons only 3.05 Å apart. The close proximity and similar inherent acidities of these two groups creates a micro-system at the surface of the protein that allows for a shared proton. Both curves deviate more from the typical sigmoidal curve, black symbols. Adding the curves, open triangles ( $\Delta$ ), reveals a smooth double-transition. At pHs higher than 3.0, the first proton is lost from the side chain of D306. The side chain and the C-terminus share the second proton at what appears to be a 1:2 ratio, respectively. Both acids are deprotonated for pHs over 8. Though the form of the titration curves may seem unusual, they are not new. A previous study by Bashford and Gerwert involved very similar calculations to determine the  $pK_a$ s and titration curves of the ionizable sites within bacteriorhodopsin (*J. Mol. Biol.* **1992**, 224, 473-486). Similar titration characteristics with a range of cooperativity were seen for acidic side chains.
